# Supplementary material
Source: Springer Nature journal article supplement (https://www.springermedizin.de/resource/supplementary/12958_2009_590_MOESM1_ESM.pdf/9568048)

## All samples

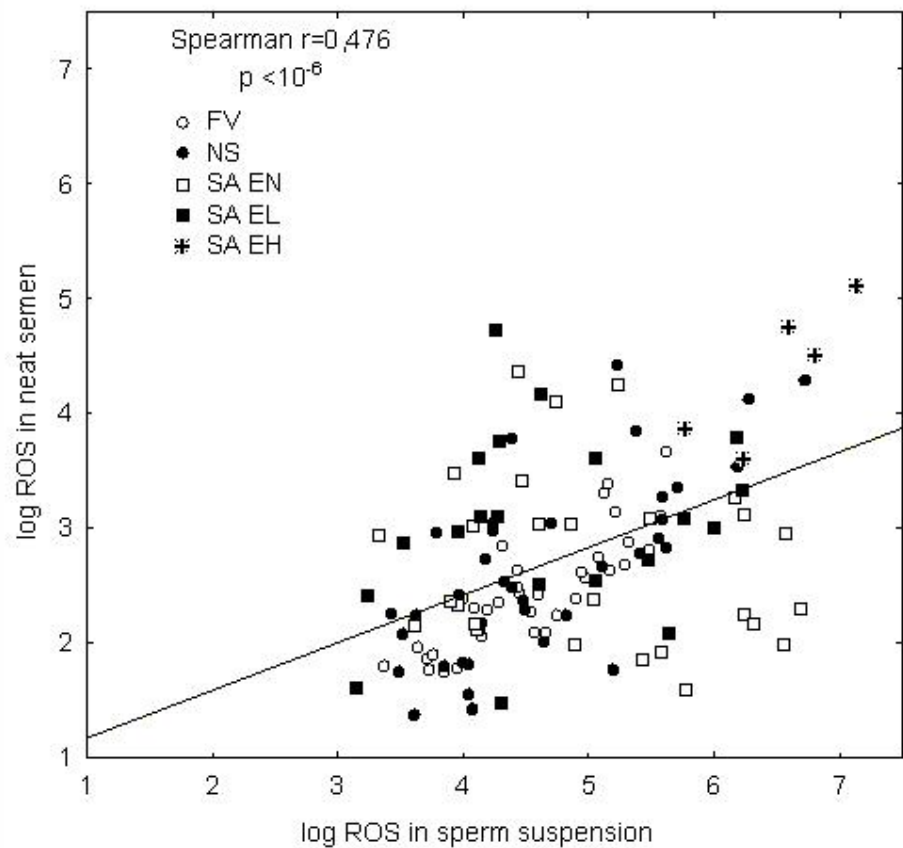

Supplement: MOESM1 [file 9568048]
